# Supplementary material for: Accurate prediction of the optical rotation and NMR properties for highly flexible chiral natural products
Source: Royal Society of Chemistry journal article supplement (doi:10.1039/c6cp04828e), 2016-01-01
Supplement: c6cp04828e1.pdf [file c6cp04828e1.pdf]

**Supporting Information**  
*for*  
**Accurate Prediction of the Optical Rotation and NMR Properties  
for Highly Flexible Chiral Natural Products**

*Muhammad Ali Hashmi, Sarah K. Andreassend, Robert A. Keyzers, Matthias Lein\**

## Experimental Details

NMR spectra were recorded using a Varian DirectDrive spectrometer equipped with a triple resonance HCN cryogenic probe operating at 600 MHz and 150 MHz for  $^1\text{H}$  and  $^{13}\text{C}$  nuclei, respectively. Residual solvent peaks were used as an internal reference for chemical shifts ( $\text{CD}_2\text{Cl}_2$ :  $\delta_{\text{H}}$  5.32,  $\delta_{\text{C}}$  53.84).<sup>1</sup> NMR spectra were obtained using 3 mm Norell® Select Series™ and 5 mm WILMAD® NMR tubes, respectively.

Optical rotations were measured using a Rudolph Research Analytical Autopol II polarimeter at the sodium D-line (589 nm).

Deuterated solvents were purchased from Cambridge Isotope Laboratories, Inc. Optima® grade dichloromethane for measuring the optical rotation was purchased from Fisher Scientific.

## Analysis Details

Analysis of the correlation between the relative energies of the conformers of **3** and the percentile rank of their antecedents in **2**. The correlation between the two values is 83%. This value rises to 95% once all conformers whose energy has risen by at least 10 percentage points have been excluded from the analysis.

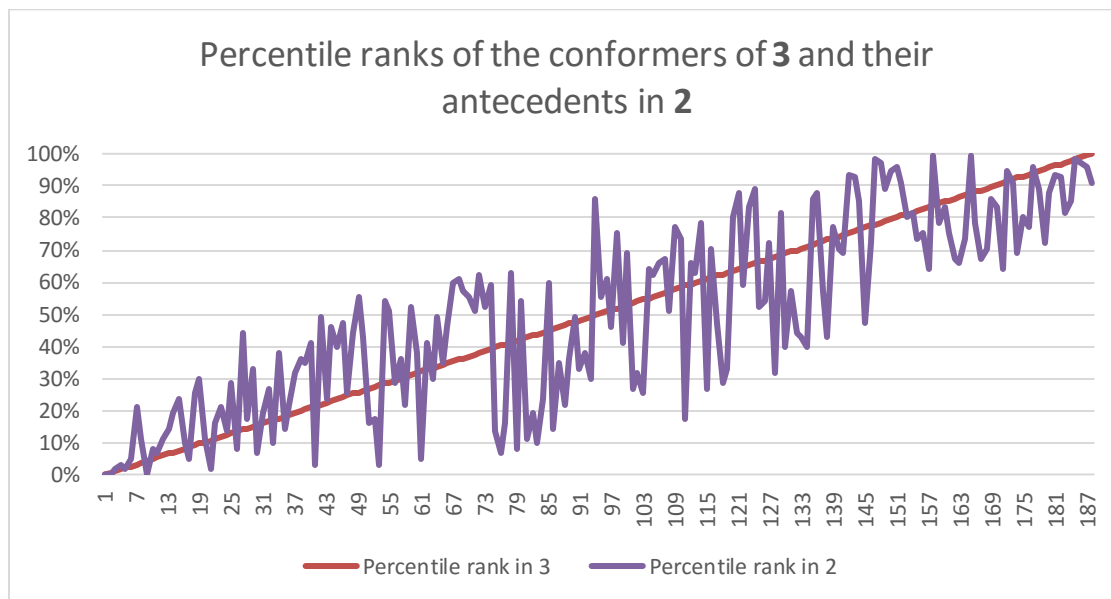

Figure S 1: Correlation analysis for all conformers of **3**.

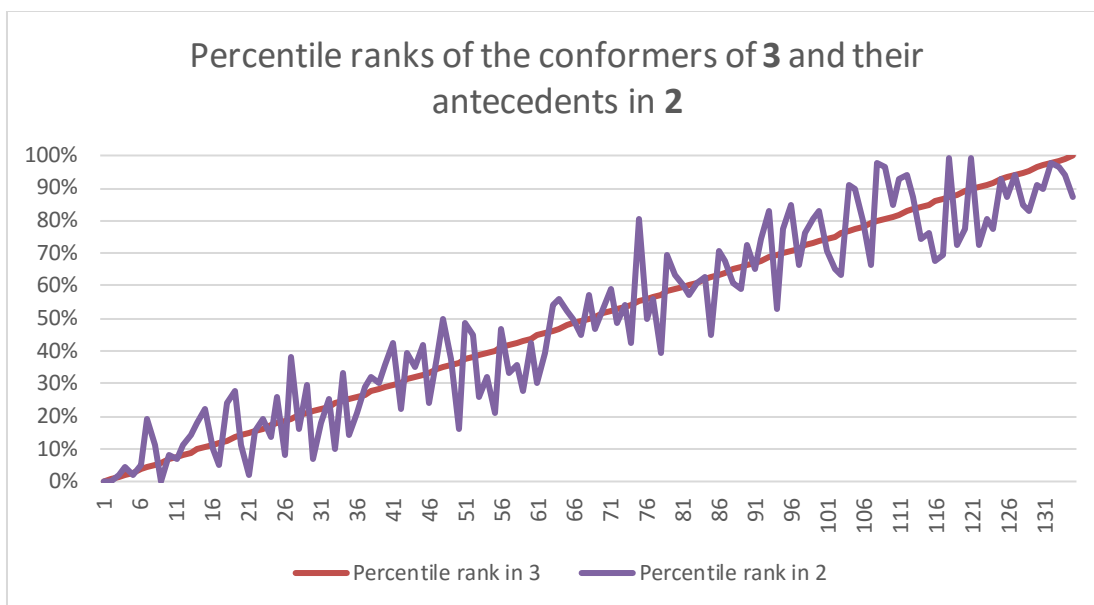

**Figure S 2: Correlation for all conformers of 3 whose antecedents do not rise in energy more than 10 percentage points.**

| Conformer no<br>(rank in 3) | percentile rank<br>in 3 | percentile rank<br>in 2 |
|-----------------------------|-------------------------|-------------------------|
| 1                           | 0%                      | 0%                      |
| 2                           | 1%                      | 0%                      |
| 3                           | 1%                      | 2%                      |
| 4                           | 2%                      | 3%                      |
| 5                           | 2%                      | 2%                      |
| 6                           | 3%                      | 5%                      |
| 7                           | 3%                      | 21%                     |
| 8                           | 4%                      | 11%                     |
| 9                           | 4%                      | 0%                      |
| 10                          | 5%                      | 8%                      |
| 11                          | 5%                      | 6%                      |
| 12                          | 6%                      | 11%                     |
| 13                          | 6%                      | 14%                     |
| 14                          | 7%                      | 19%                     |
| 15                          | 7%                      | 24%                     |
| 16                          | 8%                      | 10%                     |
| 17                          | 9%                      | 5%                      |
| 18                          | 9%                      | 25%                     |
| 19                          | 10%                     | 30%                     |
| 20                          | 10%                     | 11%                     |

|    |     |     |
|----|-----|-----|
| 21 | 11% | 2%  |
| 22 | 11% | 16% |
| 23 | 12% | 21% |
| 24 | 12% | 13% |
| 25 | 13% | 28% |
| 26 | 13% | 8%  |
| 27 | 14% | 44% |
| 28 | 14% | 18% |
| 29 | 15% | 33% |
| 30 | 16% | 6%  |
| 31 | 16% | 19% |
| 32 | 17% | 27% |
| 33 | 17% | 10% |
| 34 | 18% | 38% |
| 35 | 18% | 14% |
| 36 | 19% | 22% |
| 37 | 19% | 32% |
| 38 | 20% | 36% |
| 39 | 20% | 35% |
| 40 | 21% | 41% |
| 41 | 21% | 3%  |
| 42 | 22% | 49% |
| 43 | 22% | 24% |
| 44 | 23% | 46% |
| 45 | 24% | 40% |
| 46 | 24% | 48% |
| 47 | 25% | 25% |
| 48 | 25% | 44% |
| 49 | 26% | 56% |
| 50 | 26% | 43% |
| 51 | 27% | 16% |
| 52 | 27% | 18% |
| 53 | 28% | 3%  |
| 54 | 28% | 54% |
| 55 | 29% | 51% |
| 56 | 29% | 28% |
| 57 | 30% | 36% |
| 58 | 30% | 22% |
| 59 | 31% | 52% |

|    |     |     |
|----|-----|-----|
| 60 | 32% | 38% |
| 61 | 32% | 5%  |
| 62 | 33% | 41% |
| 63 | 33% | 30% |
| 64 | 34% | 49% |
| 65 | 34% | 35% |
| 66 | 35% | 46% |
| 67 | 35% | 60% |
| 68 | 36% | 61% |
| 69 | 36% | 57% |
| 70 | 37% | 56% |
| 71 | 37% | 51% |
| 72 | 38% | 62% |
| 73 | 39% | 52% |
| 74 | 39% | 59% |
| 75 | 40% | 13% |
| 76 | 40% | 6%  |
| 77 | 41% | 16% |
| 78 | 41% | 63% |
| 79 | 42% | 8%  |
| 80 | 42% | 54% |
| 81 | 43% | 11% |
| 82 | 43% | 19% |
| 83 | 44% | 10% |
| 84 | 44% | 24% |
| 85 | 45% | 60% |
| 86 | 45% | 14% |
| 87 | 46% | 35% |
| 88 | 47% | 22% |
| 89 | 47% | 36% |
| 90 | 48% | 49% |
| 91 | 48% | 33% |
| 92 | 49% | 38% |
| 93 | 49% | 30% |
| 94 | 50% | 86% |
| 95 | 50% | 56% |
| 96 | 51% | 61% |
| 97 | 51% | 46% |
| 98 | 52% | 75% |

|     |     |     |
|-----|-----|-----|
| 99  | 52% | 41% |
| 100 | 53% | 69% |
| 101 | 53% | 27% |
| 102 | 54% | 32% |
| 103 | 55% | 25% |
| 104 | 55% | 64% |
| 105 | 56% | 62% |
| 106 | 56% | 66% |
| 107 | 57% | 67% |
| 108 | 57% | 51% |
| 109 | 58% | 77% |
| 110 | 58% | 74% |
| 111 | 59% | 18% |
| 112 | 59% | 66% |
| 113 | 60% | 63% |
| 114 | 60% | 79% |
| 115 | 61% | 27% |
| 116 | 61% | 71% |
| 117 | 62% | 48% |
| 118 | 63% | 28% |
| 119 | 63% | 33% |
| 120 | 64% | 80% |
| 121 | 64% | 88% |
| 122 | 65% | 59% |
| 123 | 65% | 83% |
| 124 | 66% | 89% |
| 125 | 66% | 52% |
| 126 | 67% | 54% |
| 127 | 67% | 72% |
| 128 | 68% | 32% |
| 129 | 68% | 82% |
| 130 | 69% | 40% |
| 131 | 70% | 57% |
| 132 | 70% | 44% |
| 133 | 71% | 43% |
| 134 | 71% | 40% |
| 135 | 72% | 86% |
| 136 | 72% | 88% |
| 137 | 73% | 57% |

|     |     |     |
|-----|-----|-----|
| 138 | 73% | 43% |
| 139 | 74% | 77% |
| 140 | 74% | 71% |
| 141 | 75% | 69% |
| 142 | 75% | 94% |
| 143 | 76% | 93% |
| 144 | 76% | 85% |
| 145 | 77% | 48% |
| 146 | 78% | 72% |
| 147 | 78% | 98% |
| 148 | 79% | 97% |
| 149 | 79% | 89% |
| 150 | 80% | 95% |
| 151 | 80% | 96% |
| 152 | 81% | 91% |
| 153 | 81% | 80% |
| 154 | 82% | 82% |
| 155 | 82% | 74% |
| 156 | 83% | 75% |
| 157 | 83% | 64% |
| 158 | 84% | 99% |
| 159 | 84% | 79% |
| 160 | 85% | 83% |
| 161 | 86% | 75% |
| 162 | 86% | 67% |
| 163 | 87% | 66% |
| 164 | 87% | 74% |
| 165 | 88% | 99% |
| 166 | 88% | 79% |
| 167 | 89% | 67% |
| 168 | 89% | 71% |
| 169 | 90% | 86% |
| 170 | 90% | 83% |
| 171 | 91% | 64% |
| 172 | 91% | 95% |
| 173 | 92% | 91% |
| 174 | 93% | 69% |
| 175 | 93% | 80% |
| 176 | 94% | 77% |

|     |      |     |
|-----|------|-----|
| 177 | 94%  | 96% |
| 178 | 95%  | 89% |
| 179 | 95%  | 72% |
| 180 | 96%  | 88% |
| 181 | 96%  | 94% |
| 182 | 97%  | 93% |
| 183 | 97%  | 82% |
| 184 | 98%  | 85% |
| 185 | 98%  | 98% |
| 186 | 99%  | 97% |
| 187 | 99%  | 96% |
| 188 | 100% | 91% |



**xyz coordinates of the most stable conformer of 3-epixestoaminol (11)**

47

xa01-1-2-2-1-1-1-1-1-1-2.log

|   |          |          |          |
|---|----------|----------|----------|
| C | -6.35526 | 1.63172  | 0.57825  |
| C | -6.14489 | 0.32081  | -0.15808 |
| C | -4.83922 | -0.38219 | 0.22757  |
| C | -3.59601 | 0.36504  | -0.20600 |
| C | -2.30464 | -0.32182 | 0.20654  |
| C | -1.06272 | 0.41012  | -0.27373 |
| C | 0.23384  | -0.25786 | 0.15258  |
| C | 1.47748  | 0.44194  | -0.36967 |
| C | 2.77338  | -0.22183 | 0.06538  |
| C | 4.01741  | 0.46029  | -0.47873 |
| C | 5.31211  | -0.21052 | -0.05025 |
| C | 6.55229  | 0.47828  | -0.59810 |
| C | 7.86281  | -0.22465 | -0.26703 |
| N | -7.22810 | -0.64183 | 0.05202  |
| O | -4.82619 | -1.67044 | -0.35893 |
| H | -5.57921 | 2.36480  | 0.34711  |
| H | -6.35660 | 1.46806  | 1.66110  |
| H | -7.31813 | 2.06953  | 0.30253  |
| H | -6.10105 | 0.51083  | -1.23690 |
| H | -4.82816 | -0.48088 | 1.32847  |
| H | -3.61761 | 1.37369  | 0.21822  |
| H | -3.62486 | 0.47504  | -1.29730 |
| H | -5.76858 | -1.91639 | -0.37364 |
| H | -7.47760 | -0.67425 | 1.03613  |
| H | -8.05964 | -0.35804 | -0.45154 |
| H | -2.29819 | -1.34434 | -0.18402 |
| H | -2.27623 | -0.40855 | 1.30028  |
| H | -1.07885 | 1.44231  | 0.09920  |
| H | -1.08875 | 0.48202  | -1.36851 |
| H | 0.27511  | -0.30210 | 1.24833  |
| H | 0.23389  | -1.29914 | -0.19360 |
| H | 1.43874  | 0.47486  | -1.46592 |
| H | 1.47480  | 1.48678  | -0.03393 |
| H | 2.82042  | -0.24078 | 1.16162  |
| H | 2.76730  | -1.27099 | -0.25644 |
| H | 3.96739  | 0.48271  | -1.57479 |
| H | 4.02763  | 1.50851  | -0.15370 |
| H | 5.35277  | -0.23953 | 1.04440  |
| H | 5.30503  | -1.25657 | -0.38337 |
| H | 6.45776  | 0.55700  | -1.68774 |
| H | 6.58983  | 1.50823  | -0.22023 |
| H | 8.67874  | 0.28718  | -0.78885 |

|   |         |          |          |
|---|---------|----------|----------|
| C | 8.18187 | -0.27789 | 1.21815  |
| H | 7.83457 | -1.24375 | -0.67144 |
| H | 9.16031 | -0.73257 | 1.39565  |
| H | 8.20015 | 0.72731  | 1.65159  |
| H | 7.44451 | -0.86330 | 1.77319  |

## References

1. G. R. Fulmer, A. J. M. Miller, N. H. Sherden, H. E. Gottlieb, A. Nudelman, B. M. Stoltz, J. E. Bercaw and K. I. Goldberg, *Organometallics*, 2010, **29**, 2176-2179.
